# Supplementary material for: Regulation of Skeletal Muscle DRP-1 and FIS-1 Protein Expression by IL-6 Signaling
Source: Hindawi journal article supplement (doi:10.1155/2019/8908457), 2019-02-21

# Supplemental Figure 1. Basal Inhibitor Data.

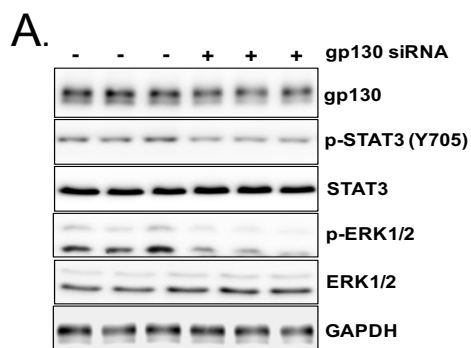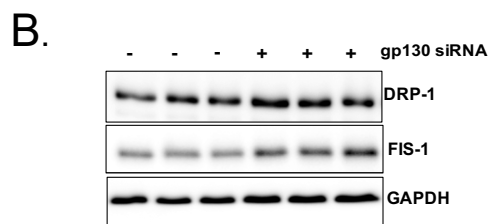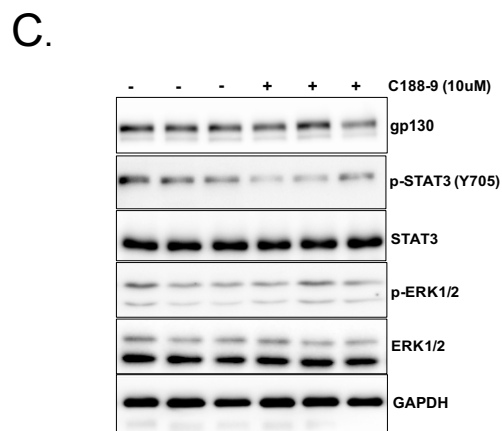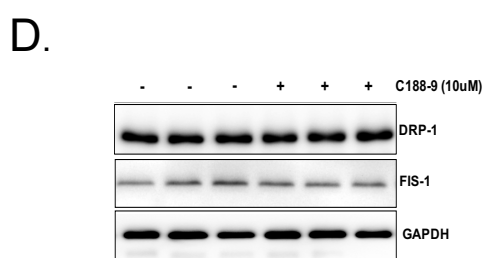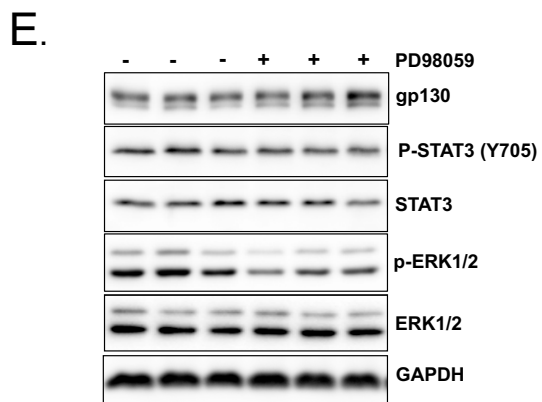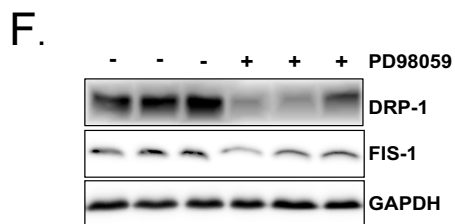

Supplement: f1 [file 8908457.f1.pdf]
